# Supplementary material
Source: publisher figshare collection journal article supplement (https://acs.figshare.com/ndownloader/files/5183668)

# ***p*-(1H-Phenanthro[9,10-*d*]imidazol-2-yl)-Substituted Calix[4]arene, a Deep Cavity for Guest Inclusion**

Enrique Botana,<sup>†</sup> Kalle Nättinen,<sup>‡</sup> Pilar Prados,<sup>†</sup> Kari Rissanen,<sup>\*,‡</sup> and Javier de Mendoza<sup>\*,†,§</sup>

<sup>†</sup>Universidad Autónoma de Madrid, Departamento de Química Orgánica, Cantoblanco, 28049 Madrid, Spain, <sup>‡</sup>University of Jyväskylä, NanoScience Center, Department of Chemistry, P. O. Box 35, 40014 JYU, Finland, and <sup>§</sup>Institute of Chemical Research of Catalonia (ICIQ), Avda. Països Catalans s/n, 43007-Tarragona, Spain

*jmendoza@iciq.es, kari.rissanen@jyu.fi*

## **Supporting Information**

### **Experimental Section**

**General.** All solvents were dried and distilled according to standard procedures. Reagents were used as purchased. Thin layer chromatography (TLC) was performed on Alugram Sil G/UV254-coated aluminum sheets (Macherey-Nagel) with detection by UV at 254/365 nm and / or with bromocresol green (1.4 mM in EtOH, 4% 0.1M NaOH). Melting points were determined on a Gallenkamp apparatus. NMR spectra were recorded on Bruker AC-200 (<sup>1</sup>H: 200 MHz; <sup>13</sup>C: 50 MHz), Bruker AC-300 and Bruker AMX-500 (<sup>1</sup>H: 500 MHz; <sup>13</sup>C: 125 MHz) spectrometers at 298 K or indicated otherwise using partially deuterated solvents as internal standards. Coupling constants (*J*) are denoted in Hz and chemical shifts ( $\delta$ ) in ppm. Multiplicities are denoted as follows: s = singlet, d = doublet, t = triplet, q = quartet, dd = double doublet, m = multiplet, br = broad. Mass spectra by electrospray ionization (ESI) were recorded on a HP1100MSD spectrometer and by MALDI-TOF method on a

REFLEX spectrometer using ditranol as matrix and fast atom bombardment ionization (FAB) on a VG-autospec spectrometer using *m*-nitrobenzyl alcohol as matrix. Elemental analyses were performed on a LECO CHNS 932 micro-analyser. 5,11,17,23-tetraformyl-25,26,27,28-tetrapropoxycalix[4]arene (**4**) was synthesized as described in the literature. For reasons of clarity and in order to reduce space, the name calix[4]arene was used instead of the original IUPAC name: pentacyclo[19.3.1.13,7.19,13,115,19]octacos-1(25),3,5,7(28),9,11,13(27),15,17,19(26),21,23-dodecane.

**5,11,17,23-Tetrakis(1H-phenanthro[9,10-*d*]imidazol-2-yl)-25,26,27,28-tetrapropoxycalix[4]arene (**2**).** A mixture of **4** (300 mg, 0.425 mmol), **3** (709 mg, 3.404 mmol) and ammonium acetate (5.24 g, 68.00 mmol) in glacial AcOH (39 mL) was refluxed for 7 h. The reaction was cooled to room temperature and the yellow precipitate was collected by filtration, subsequently washed with AcOH, 10% aq Na<sub>2</sub>CO<sub>3</sub> and water and dried under vacuum at 130°C, affording **1** (400 mg, 65%) as a pale yellow solid, m. p. > 315°C. <sup>1</sup>H NMR (ROESY) (500 MHz, [D<sub>6</sub>]-DMSO): δ 13.18 (s, 4 H, NH), 8.68 (d, *J* = 8.5 Hz, 4 H, Hd), 8.65 (d, *J* = 8.5 Hz, 4 H, He), 8.47 (d, *J* = 7.5 Hz, 4 H, Ha), 8.36 (d, *J* = 8.1 Hz, 4 H, Hh), 8.05 (s, 8 H, Hi), 7.53 (t, *J* = 7 Hz, 4 H, Hg), 7.47 (m, 12 H, Hb, Hc, Hf), 4.71 (d, *J* = 12 Hz, 4 H, CH<sub>ax</sub>), 4.10 (t, *J* = 7.2 Hz, 8 H, OCH<sub>2</sub>), 3.69 (d, *J* = 12 Hz, 4 H, CH<sub>eq</sub>), 2.13 (h, *J* = 7.2 Hz, 8 H, CH<sub>2</sub>), 1.10 (t, *J* = 7.2 Hz, 12 H, CH<sub>3</sub>); <sup>13</sup>C NMR (DEPT) (75 MHz, [D<sub>6</sub>]-DMSO): δ 157.5 (C), 149.3 (Cimid.), 136.8, 135.1, 127.5 (C), 127.2, 126.8 (CH), 125.1 (C), 124.9, 123.9, 123.7 (CH), 122.4 (C), 121.9 (CH), 77.04 (CH<sub>2</sub>O), 31.1 (CH<sub>2</sub>), 23.0 (CH<sub>2</sub>), 10.4 (CH<sub>3</sub>); ESI-MS (180v, MeOH+ 0.1%TFA): *m/z* = 729.6 [(M+2H)<sup>2+</sup>], 1458.7 [(M+H)<sup>+</sup>]; MALDI-TOF MS (ditranol): *m/z* = 1458.7 [(M+H)<sup>+</sup>]; elemental analysis calcd (%) for C<sub>100</sub>H<sub>80</sub>N<sub>8</sub>O<sub>4</sub>·5(H<sub>2</sub>O): C 77.60, H 5.86, N 7.24; found: C 77.48, H 5.62, N 7.19.

**2-(4-Methoxyphenyl)-1H-phenanthro[9,10-*d*]imidazole (**5**).** A mixture of 4-methoxybenzaldehyde (175 μL, 1.44 mmol), **3** (300 mg, 1.44 mmol) and ammonium acetate (2.22 g, 28.08 mmol) in glacial AcOH (20 mL) was refluxed for 2 h. The solution was cooled to room temperature and poured into

ice/water (150 mL) and the white precipitate was collected by filtration and washed with water. The solid was purified by precipitation in MeOH/water and dried under vacuum, yielding **5** (253 mg, 54%) as a white solid, m. p. 126°C (dec.) <sup>1</sup>H NMR (200 MHz, [D<sub>6</sub>]-DMSO): 8.83 (d, *J* = 7.8 Hz, 2 H, Hd), 8.56 (d, *J* = 7.8 Hz, 2 H, Ha), 8.26 (d, *J* = 8.6 Hz, 2 H, Hi), 7.73 (t, *J* = 7 Hz, 2 H, Hb), 7.61 (t, *J* = 7 Hz, 2 H, Hc), 7.17 (d, *J* = 8.6 Hz, 2 H, Hj), 3.86 (s, 3 H, OCH<sub>3</sub>); <sup>13</sup>C NMR (50 MHz, [D<sub>6</sub>]-DMSO): δ 160.4, 149.4, 136.4, 127.9, 127.6, 127.2, 125.2, 124.0, 123.0, 122.0, 115.2, 114.5, 55.5.

**2-(4-Methoxyphenyl)-1-methylphenanthro[9,10-d]imidazole (6).** A mixture of **5** (100 mg, 0.308 mmol) and NaH (60% on a dispersion oil, 25 mg, 0.616 mmol) in dry THF (12 mL) was heated for 30 min at 80°C in a sealed tube. The mixture was cooled to room temperature and methyl iodide (38 μL, 0.616 mmol) was added. The reaction was stirred at room temperature for 24 h, 30% aq NH<sub>3</sub> (1 mL) was added and the mixture was stirred for 1 h and concentrated at reduced pressure. The residue was dissolved in CHCl<sub>3</sub>/EtOH 6% (50 mL), washed with water (3×) and brine, dried (Na<sub>2</sub>SO<sub>4</sub>) and concentrated to dryness. The solid was triturated with Et<sub>2</sub>O, filtered off and dried, giving **6** (68 mg, 65%) as a pale yellow solid, m. p. 176-177°C; <sup>1</sup>H NMR (COSY) (500 MHz, CDCl<sub>3</sub>): δ 8.80 (m, 1 H, He), 8.78 (m, 1 H, Hd), 8.67 (d, *J* = 8 Hz, 1 H, Hh), 8.38 (m, 1 H, Ha), 7.72 (AA'BB', *J* = 8.5 Hz, 2 H, Hi), 7.70 (m, 1H, Hf), 7.63-7.55 (m, 3 H, Hb, Hc, Hg), 7.06 (AA'BB', *J* = 8.5 Hz, 2 H, Hj), 4.20 (s, 3 H, NMe), 3.88 (s, 3H, OMe); <sup>13</sup>C NMR (DEPT) (125 MHz, CDCl<sub>3</sub>): δ 160.6 (C), 152.6 (Cimid.), 137.3 (C), 131.3(CH), 129.0, 128.0, 127.5, 127.3 (C), 127.2, 126.6, 125.3, 124.7, 124.4 (CH), 123.4 (C), 123.1, 122.6, 120.6, 114.2 (CH), 55.4 (OMe), 36.1 (NMe); FAB<sup>+</sup> MS (m-NBA): *m/z* = 339.2 [(M+H)<sup>+</sup>]

The crystallographic data were recorded on a Nonius Kappa CCD diffractometer. The structure was solved using direct methods (SHELXS-97) and the refinement was made by full matrix least-squares techniques (SHELXL-97). No absorption correction was performed.

Crystal data and structure refinement for **7**.

|                                 |                                                                                                                                         |
|---------------------------------|-----------------------------------------------------------------------------------------------------------------------------------------|
| Empirical formula               | C <sub>11</sub> H <sub>8</sub> Cl <sub>4</sub> F <sub>9</sub> N <sub>8</sub> O <sub>13</sub>                                            |
| Formula weight                  | 2049.65                                                                                                                                 |
| Temperature                     | 123(2) K                                                                                                                                |
| Wavelength                      | 0.71069 Å                                                                                                                               |
| Crystal system                  | Triclinic                                                                                                                               |
| Space group                     | P-1 No.2                                                                                                                                |
| Unit cell dimensions            | a = 14.7972(2) Å    alpha = 97.406(1) deg.<br>b = 16.9446(3) Å    beta = 106.599(1) deg.<br>c = 22.5701(3) Å    gamma = 109.447(1) deg. |
| Volume                          | 4954.22(13) Å <sup>3</sup>                                                                                                              |
| Z                               | 2                                                                                                                                       |
| Density (calculated)            | 1.374 Mg/m <sup>3</sup>                                                                                                                 |
| Absorption coefficient          | 0.205 mm <sup>-1</sup>                                                                                                                  |
| F(000)                          | 2116                                                                                                                                    |
| Crystal size                    | 0.40 x 0.30 x 0.15 mm                                                                                                                   |
| Theta range for data collection | 2.92 to 24.71 °                                                                                                                         |
| Index ranges                    | -17<=h<=17, -19<=k<=19, -26<=l<=26                                                                                                      |
| Reflections collected           | 32705                                                                                                                                   |
| Independent reflections         | 16844 [R(int) = 0.0409]                                                                                                                 |

|                                 |                                                 |
|---------------------------------|-------------------------------------------------|
| Completeness to theta = 25.70 ° | 99.8 %                                          |
| Max. and min. transmission      | 0.9224 and 0.9699                               |
| Refinement method               | Full-matrix least-squares on F2                 |
| Data / restraints / parameters  | 16844 / 37 / 1298                               |
| Goodness-of-fit on F2           | 1.064                                           |
| Final R indices [I>2sigma(I)]   | R1 = 0.1021, wR2 = 0.2687                       |
| R indices (all data)            | R1 = 0.1468, wR2 = 0.3044                       |
| Largest diff. peak and hole     | 1.332 and -1.628 e.Å <sup>-3</sup> <sup>a</sup> |

<sup>a</sup> The large remaining electron density is due to rotational disorder of the trifluoromethyl end of the TFA molecule

$^1\text{H}$  NMR spectrum (DMSO- $d_6$ , 200 MHz, 298K) of compound **5** (2.00-9.50 ppm)

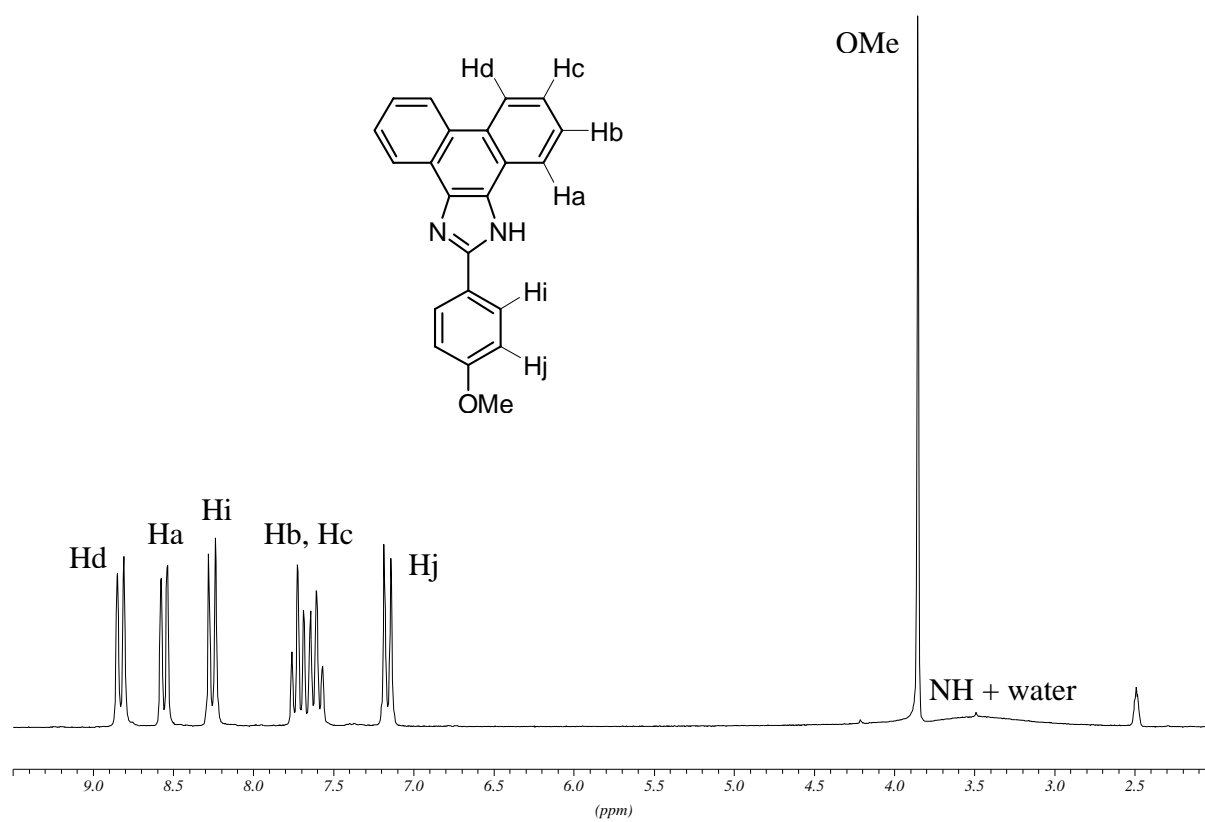

$^1\text{H}$  NMR spectrum ( $\text{CDCl}_3$ , 500 MHz, 298K) of compound **6** (6.80-9.20 ppm) (3.80-4.30 ppm)

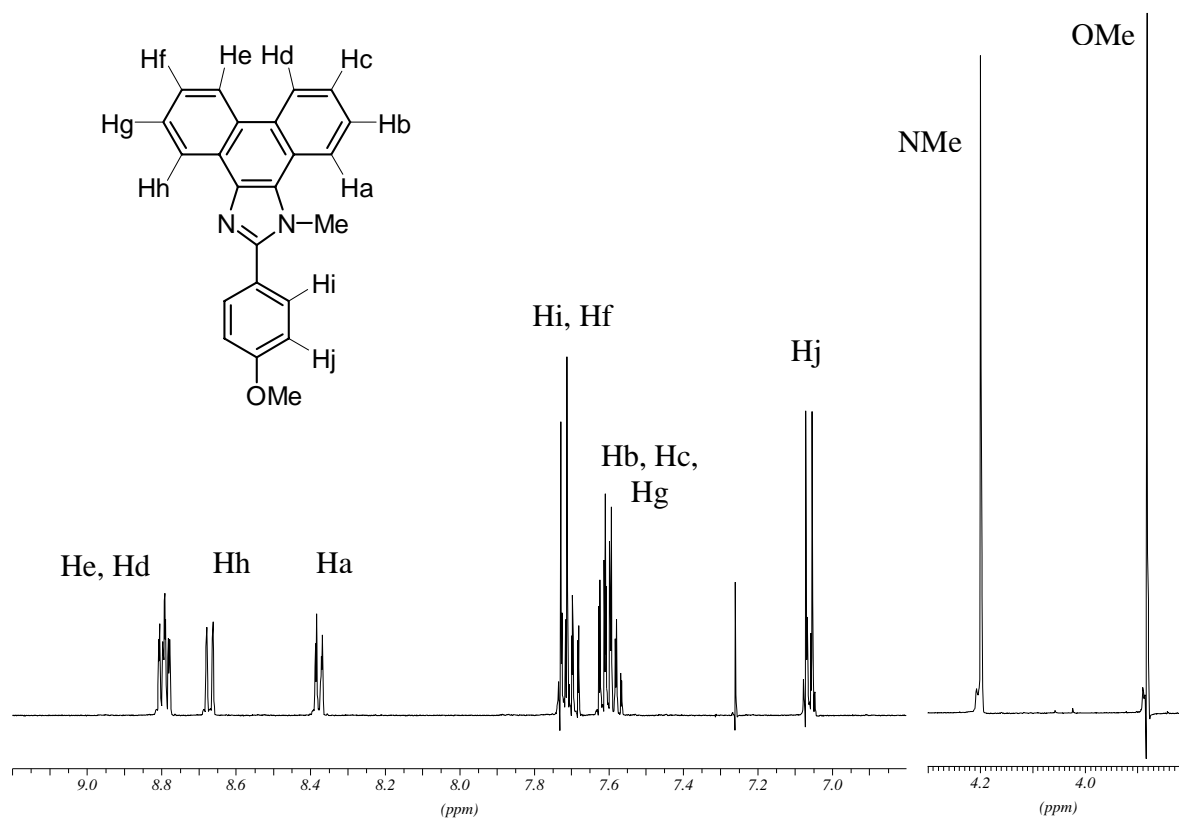

$^1\text{H}$  NMR spectrum ( $\text{CDCl}_3/\text{MeOD}$ , 300 MHz, 298K) of compound **2** (0.50-10.00 ppm)

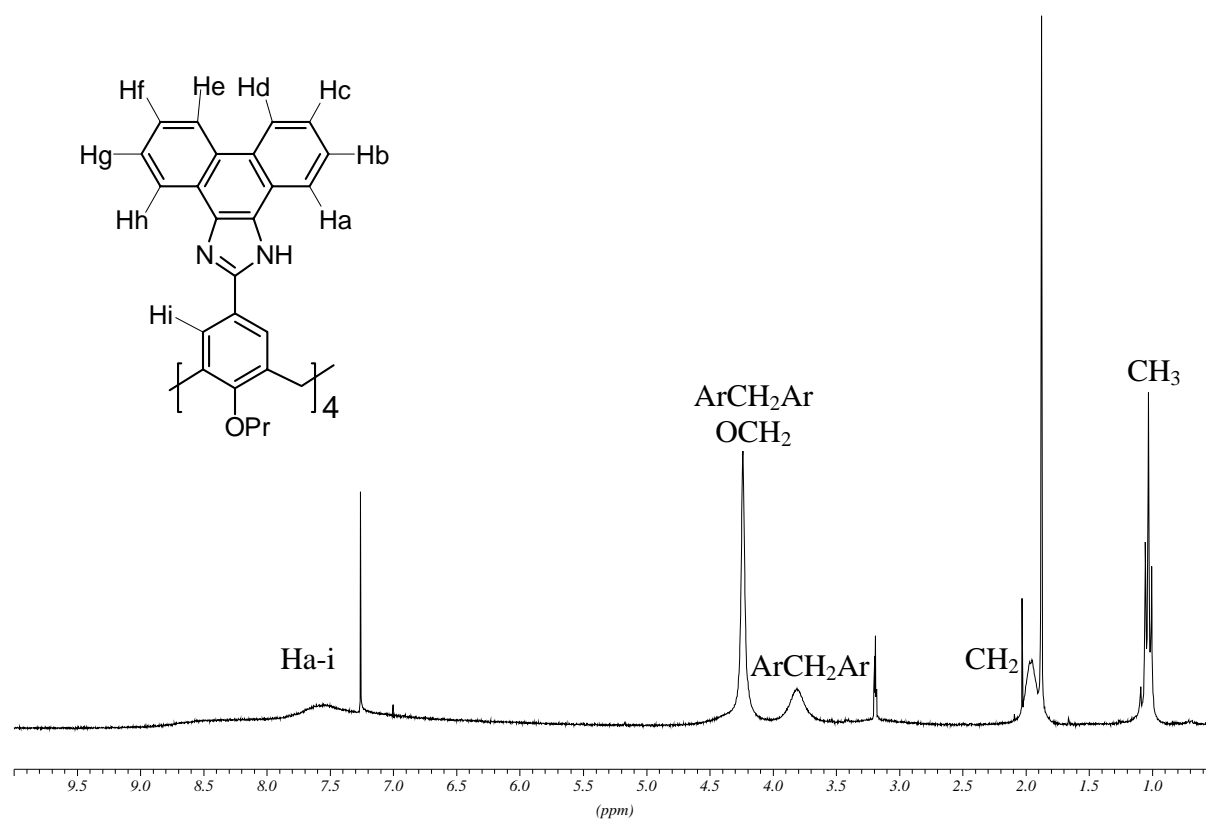



$^1\text{H}$  NMR spectrum ( $\text{CDCl}_3/\text{MeOD}/\text{TFA-}d$ , 200 MHz, 298K) of compound **2** (0.50-10.00 ppm)

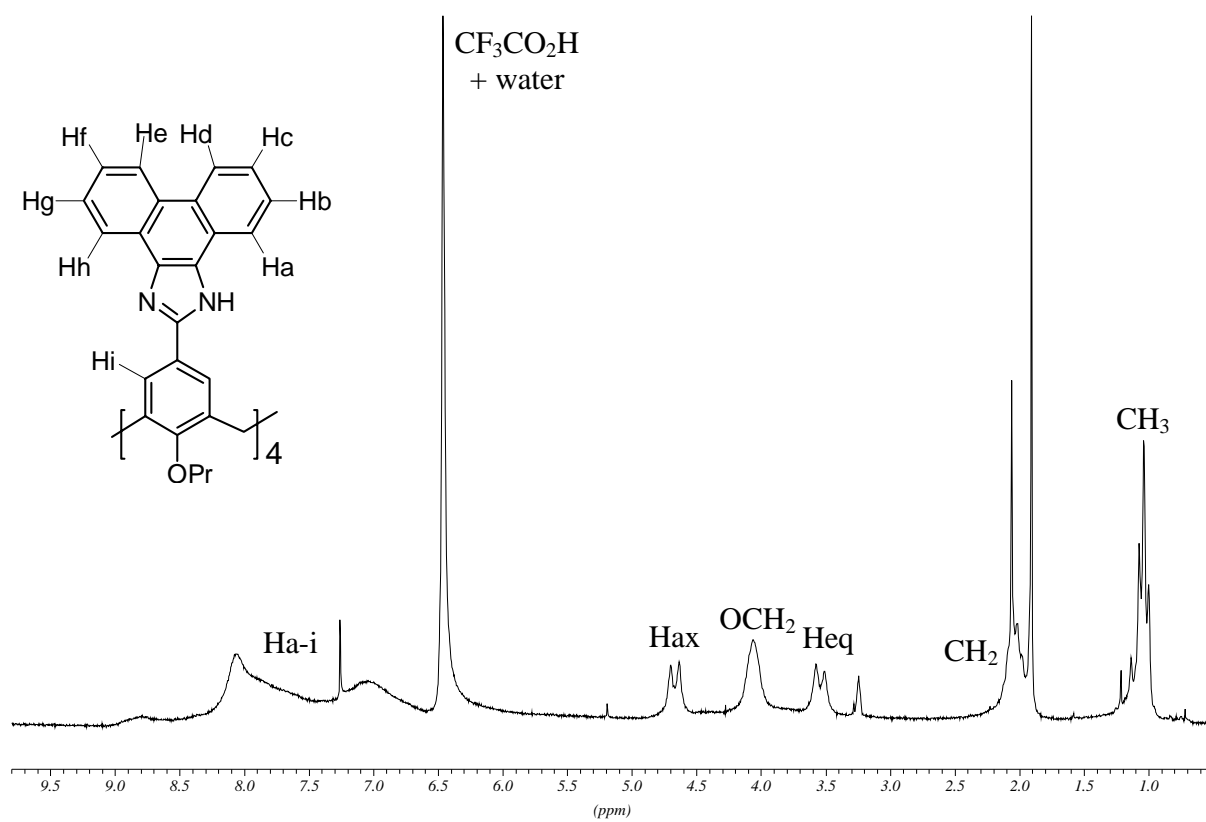

$^1\text{H}$  NMR spectrum ( $\text{CDCl}_3 + \text{TFA}$ , 200 MHz, 298K) of compound **2** (0.50-14.50 ppm)

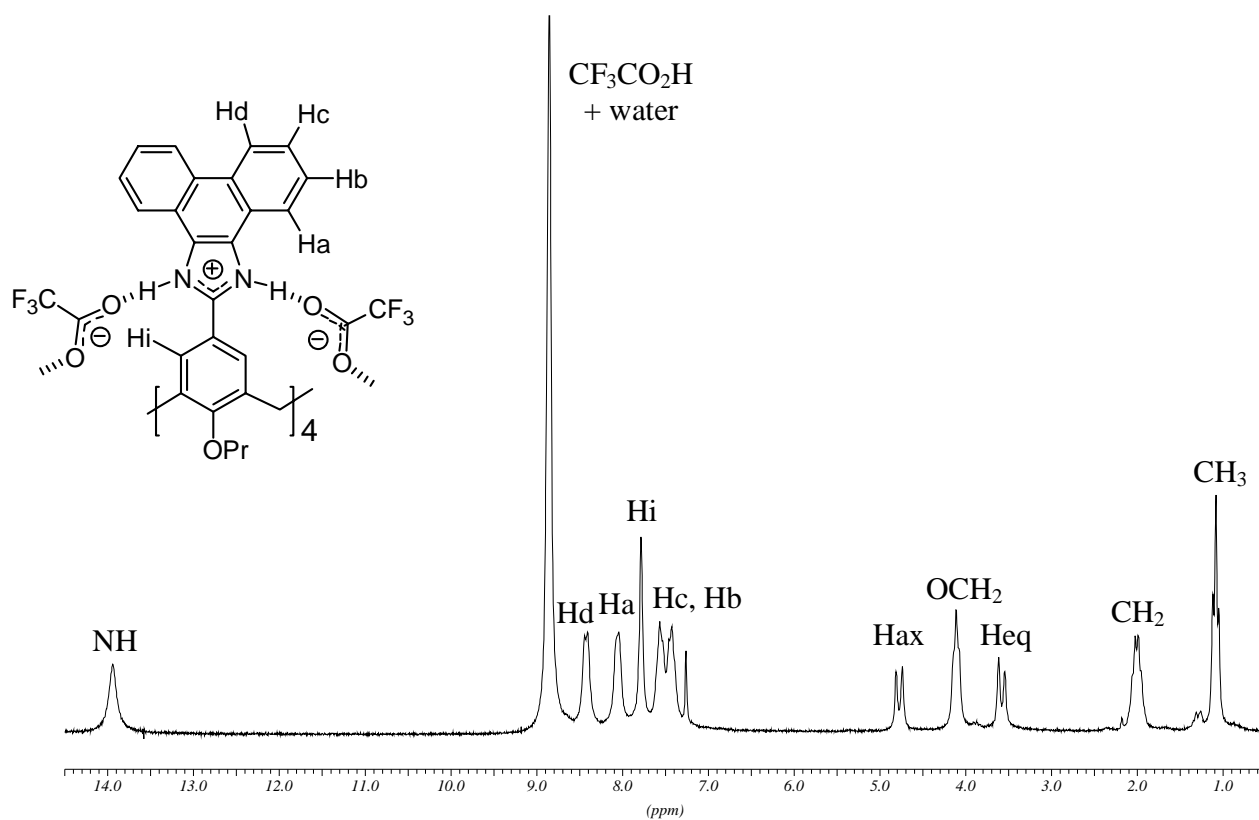

VT- $^1\text{H}$  NMR spectra ( $\text{CDCl}_3 + \text{TFA}$ , 500 MHz) of compound **2** (0-16 ppm).

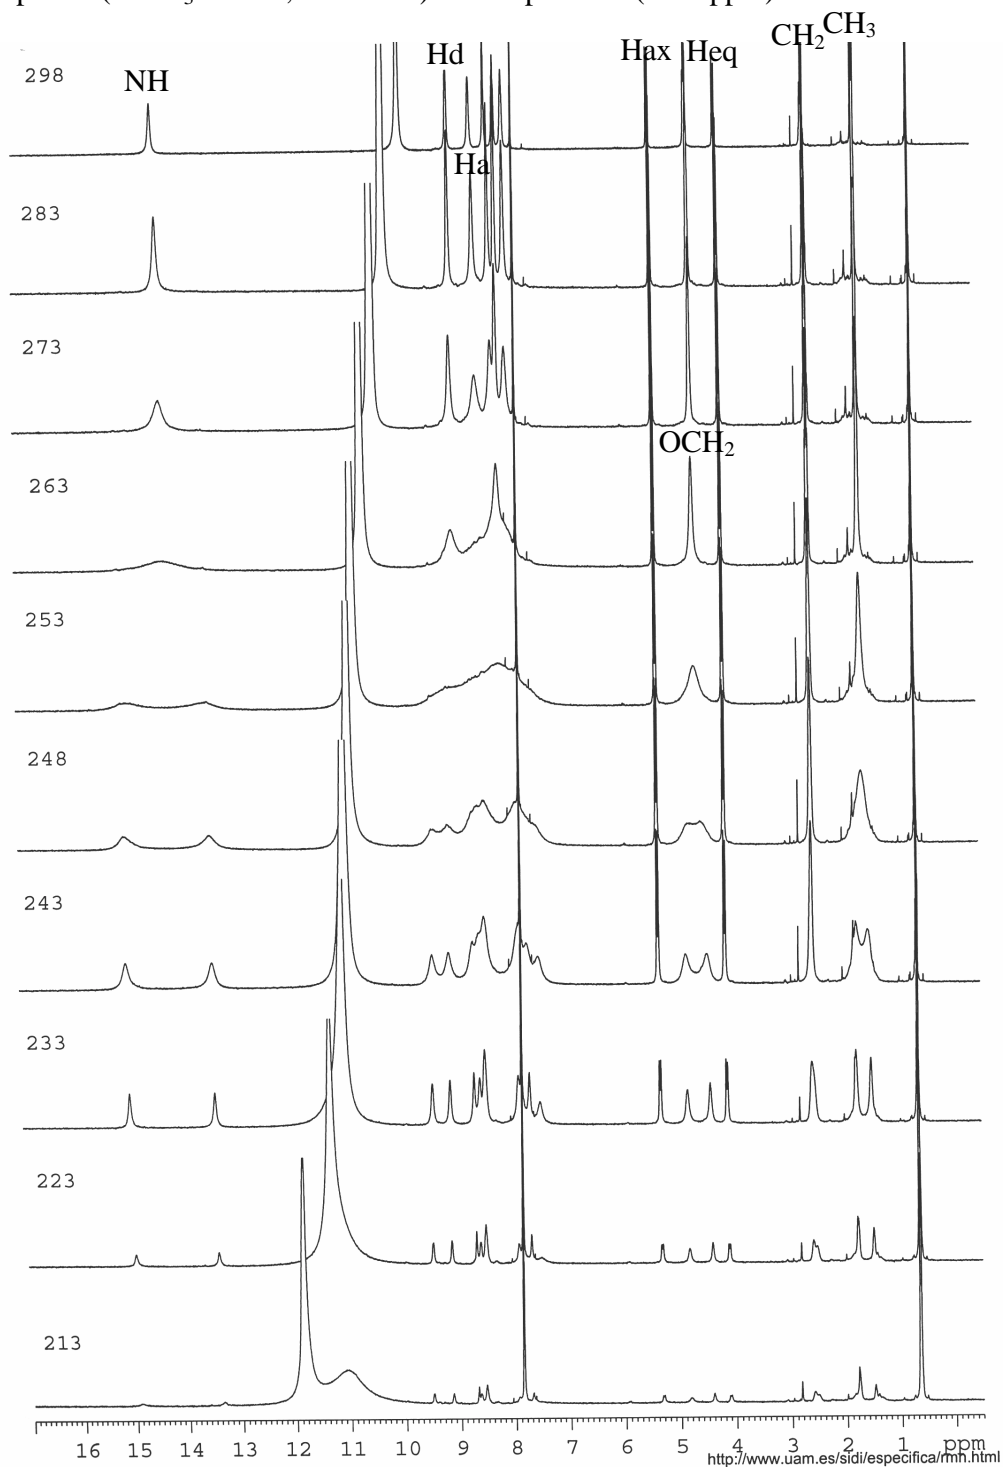

VT- $^1\text{H}$  NMR spectra ( $\text{CDCl}_3 + \text{TFA}$ , 500 MHz) of a 1:1 mixture of compounds **2** and **6** (10-18 ppm).

**A**: NHs signals of complexed **2** (*pinched cone*); **A<sub>G</sub>**: NH signal of complexed **6**; **B**: NH signal of free **2** (*pinched cone*); **C**: NH signal of free **6**.

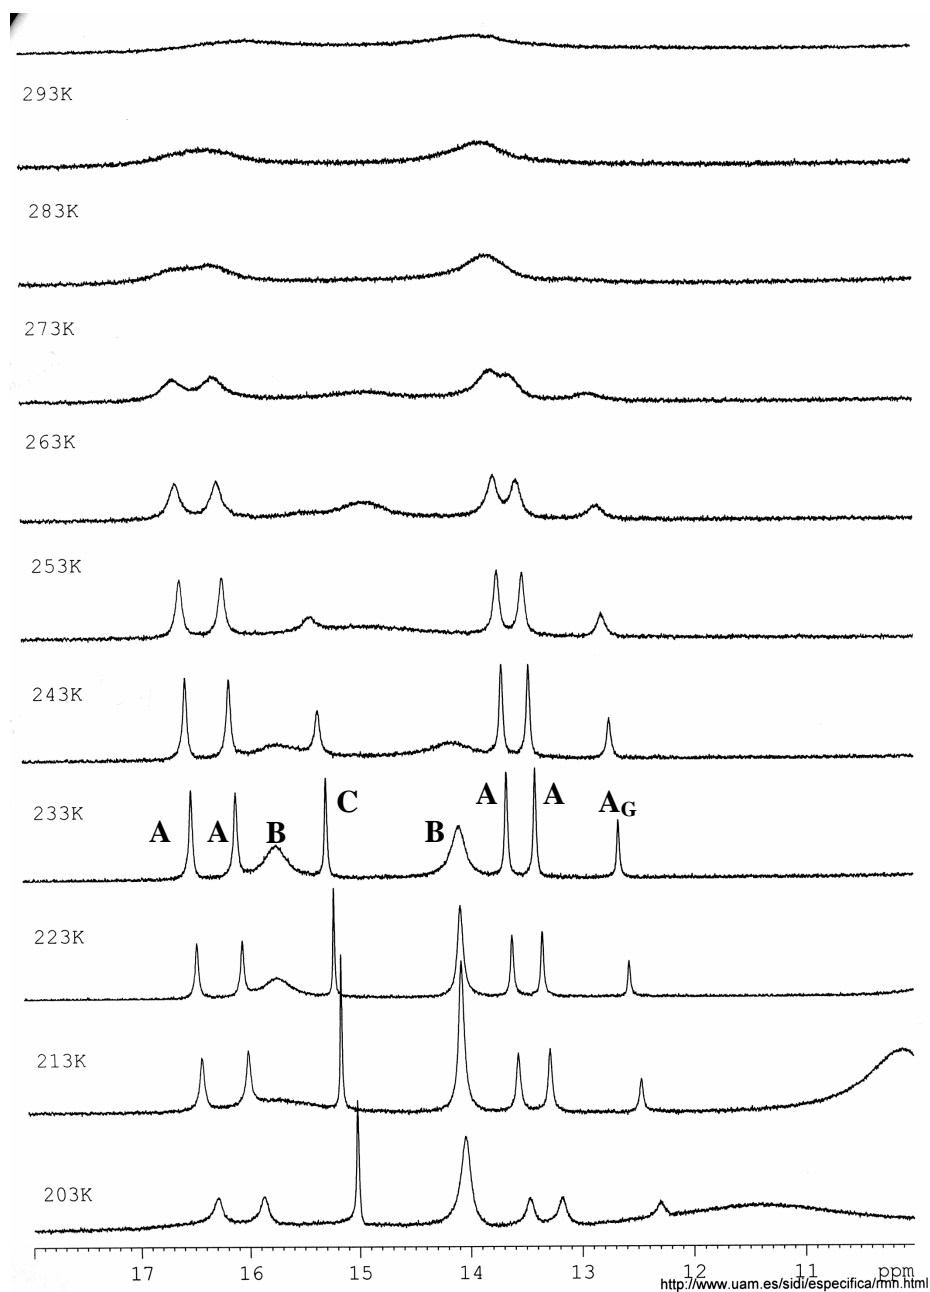

VT- $^1\text{H}$  NMR spectra ( $\text{CDCl}_3 + \text{TFA}$ , 500 MHz) of a 1:1 mixture of compounds **2** and **6** (3-6 ppm).

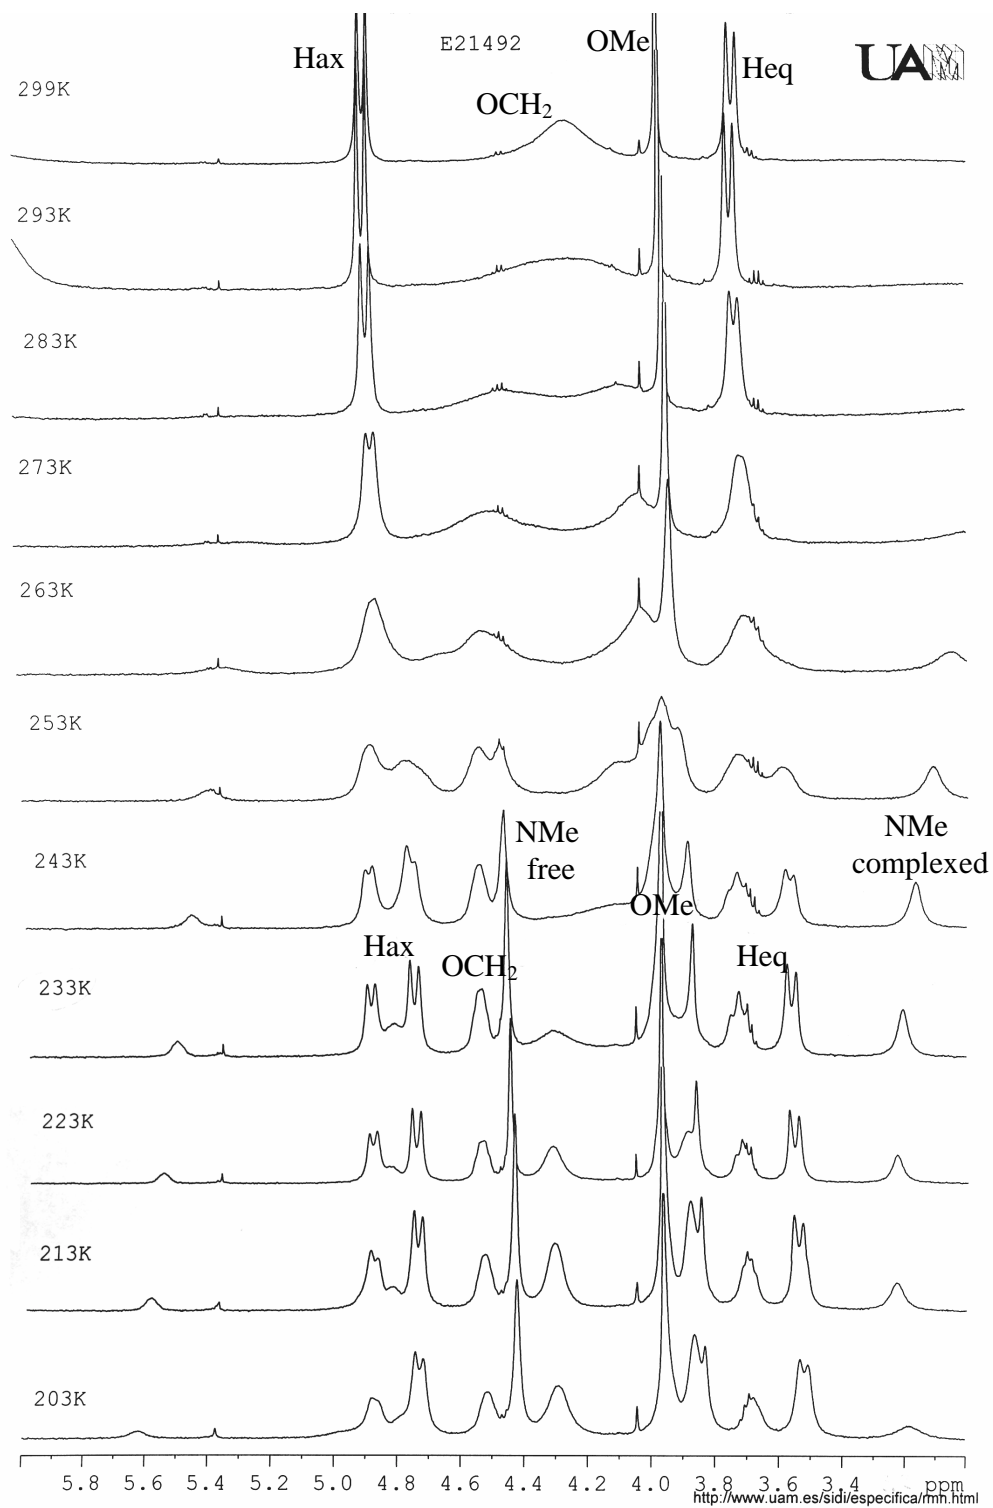

$^1\text{H}$  NMR spectrum ( $\text{CDCl}_3/\text{MeOD} + 60\% \text{HNO}_3$ , 200 MHz, 298K) of compound **2** (0.50-9.00 ppm)

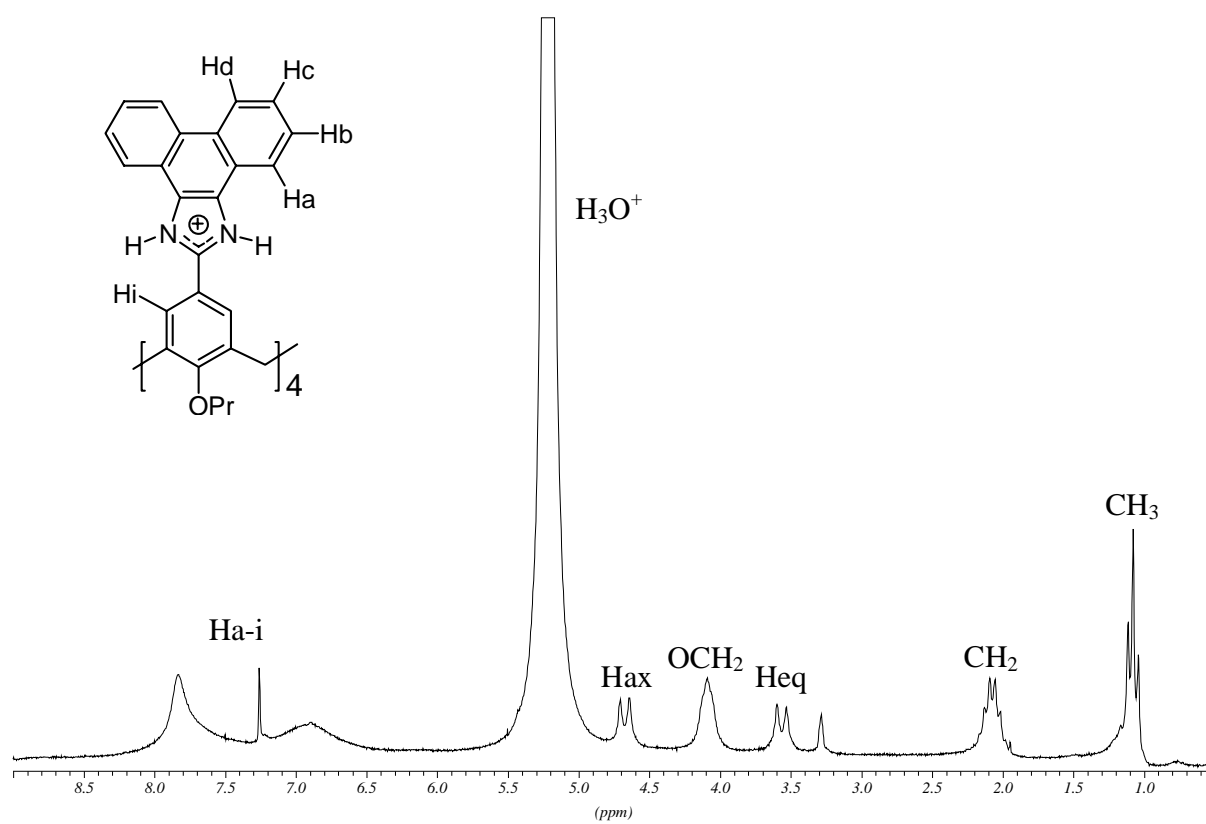

$^1\text{H}$  NMR spectrum (DMSO- $d_6$ , 500 MHz, 298K) of compound **2** (0.50-14.00 ppm)

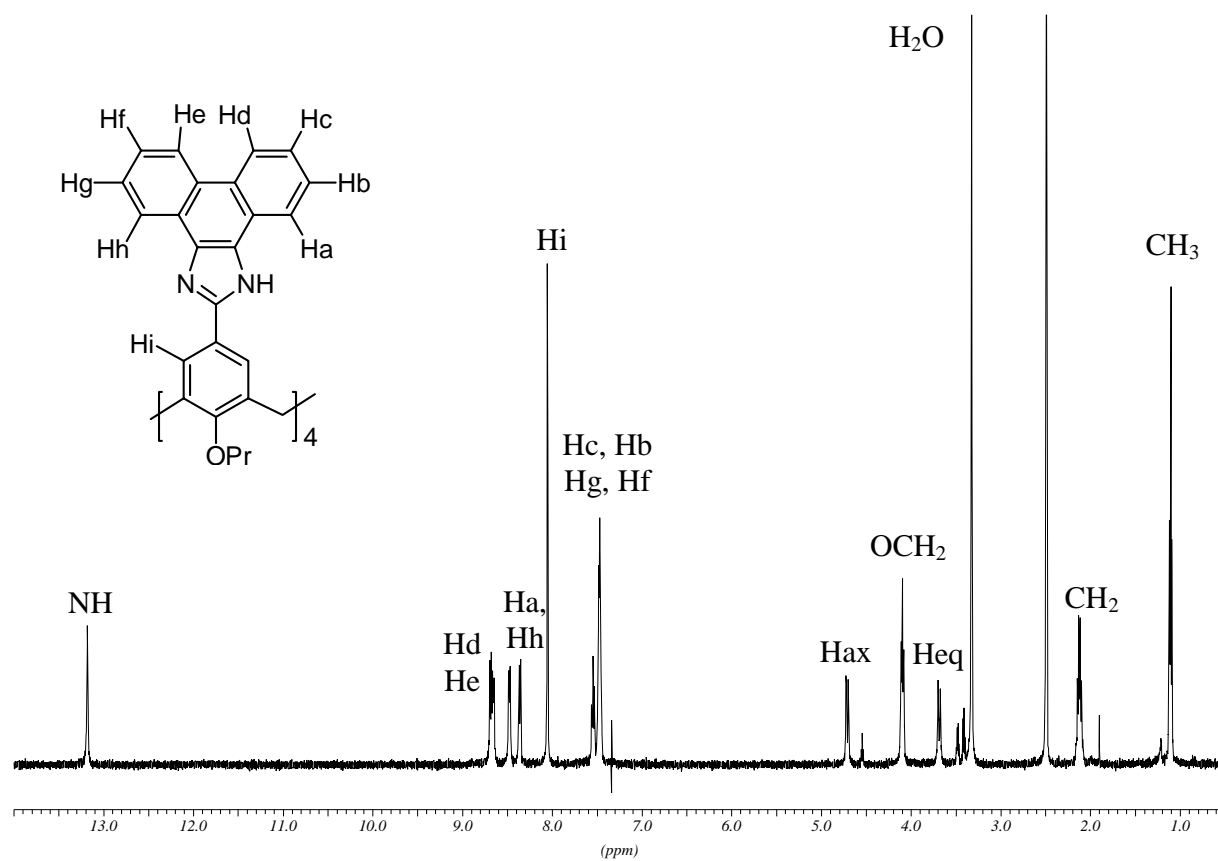

$^{13}\text{C}$  NMR spectrum (DMSO- $d_6$ , 75 MHz, 298K) of compound **2** (165-120 ppm) (80-5 ppm)

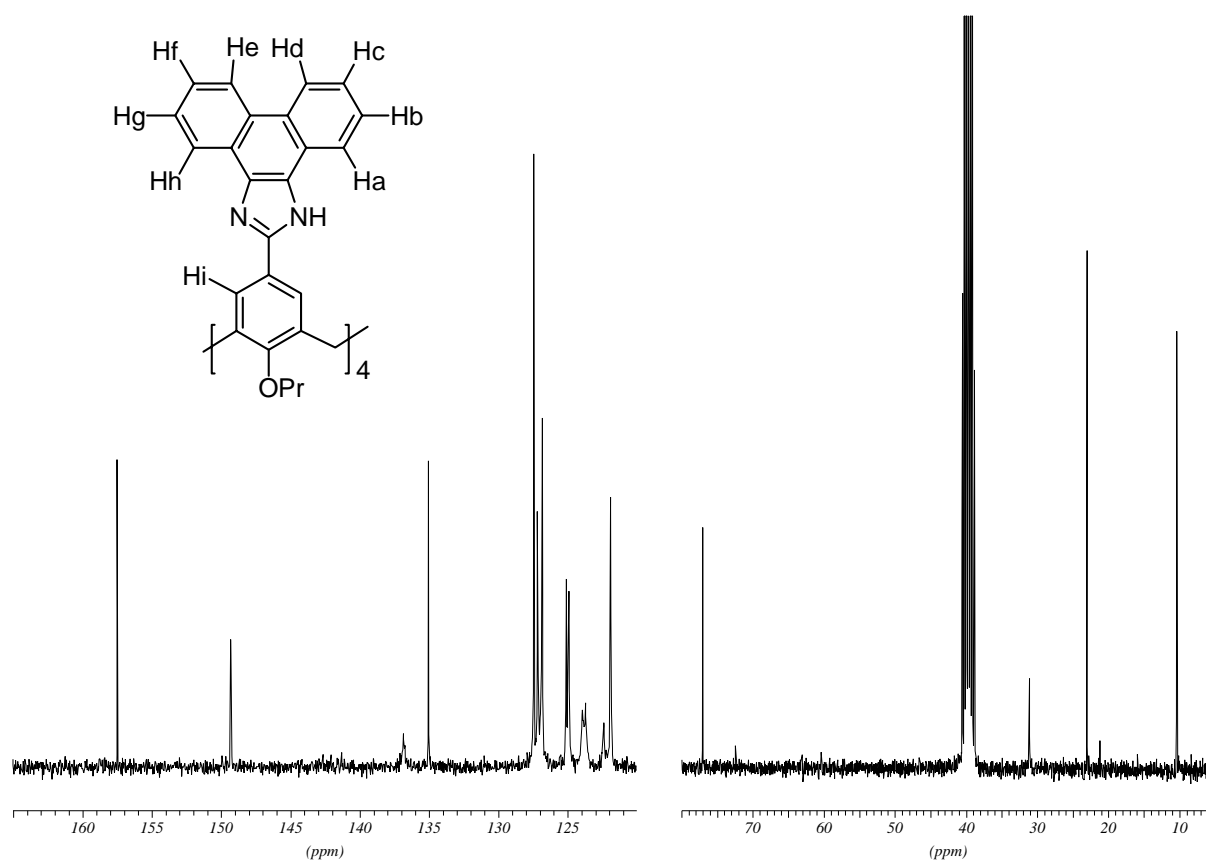



T-ROESY spectrum (DMSO- $d_6$ , 500 MHz, 298K, mixing time 300 ms) of compound **2**

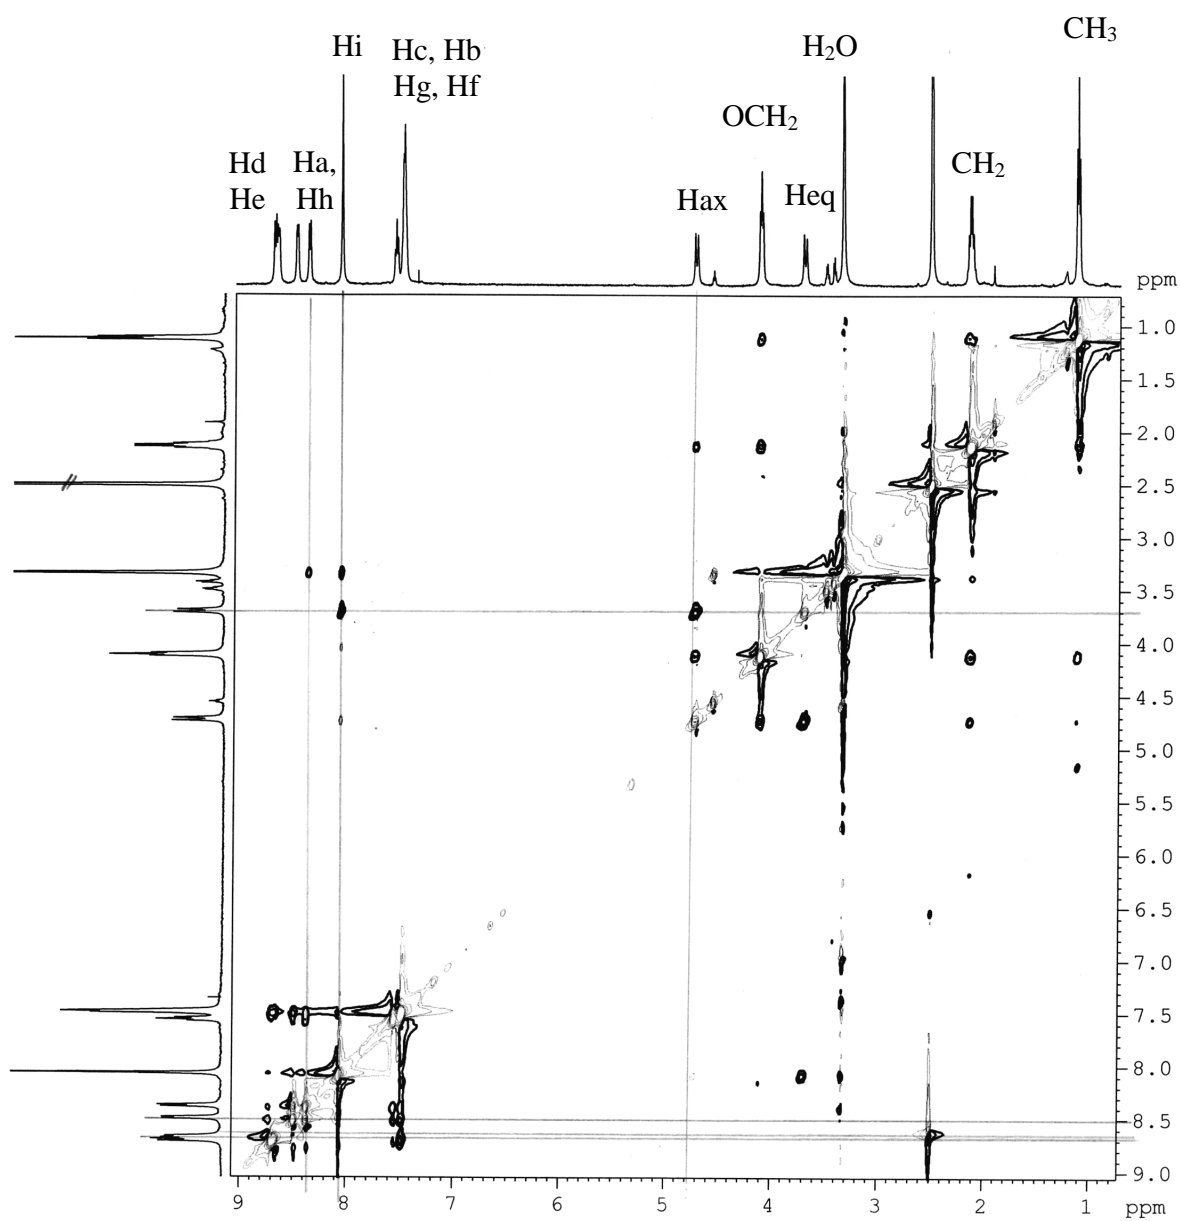

Supplement: Supplementary file 1 [file 5183668]
